# Supplementary material for: Building the Next Generation of Humanized Hemato-Lymphoid System Mice
Source: Front Immunol. 2021 Feb 22;12:643852. doi: 10.3389/fimmu.2021.643852 (PMC7938325; doi:10.3389/fimmu.2021.643852)
Supplement: Supplementary file 1 [file Table_1.xlsx]

## Sheet: Supplementary table 1
Strain		Intended improvement	Actual improvement	Refs
NSG	Hematopoesis	increasedHSPC engraftment from previous models	increased engraftment from previous models. differentiation is skewed towards B &T cells lineages	[33, 34, 35]
	Innate immunity	increase myeloid engraftment	increased myeloid engraftment. lower than wanted myelo-monocytic lineages
	Adaptive immunity	Better engraftment of T and B cells (in both adult and in newborns)	T cells develop in the mouse thymus; development of LNs and PALS-like structures in the spleen; some Ab response to OVA (though lower than in humans). Reactivity to allogeneic human DCs; low response to autologous human DCs and autologous mouse DCs
NSG-W41	Hematopoesis	improve HSC engraftment	improved HSC engraftment, no radition need (genetic preconditioning). increased erthro-megakaroycytic lineages	[18, 64, 79]
	Innate immunity
	Adaptive immunity		Higher B cell freq in the blood compared to NSG-SGM3. Defect in B cell maturation
BRGF	Hematopoesis	open the niche		[66]
	Innate immunity
	Adaptive immunity	Increased T cell homeostasis due to increased DC engraftment	Increased T cells, lower B cells (closer distribution to humans). model for vaccines and elucidating NK DC crosstalk during infections and anti-tumor activity
MISTRG	Hematopoesis	Bi-directional host-donor tolerance, open the niche, Graft-supporting factors, Cross-reactivity of the graft to the host	genetic preconditioning, increased engraftment and serial tranplantation, opened the niche. Long term stemness- 4 serial transplantations. anemia/thrombocytopenia	[17, 18, 71]
	Innate immunity	increase engraftment	6 fold increase in Myeloid compartment compared to NSG. Anemia
	Adaptive immunity	Better engraftment of myeloid cells (that would support antigen-presentation to T cells)	Better engraftment of myeloid cells (that would support antigen-presentation to T cells). Support differentiation of B, T, NK cells
NSG-SGM3	Hematopoesis	increase engraftment and provide support for differentiation	HSC exhaustion. Loss of human graft after 3–4 months. Up to 4 months reported. Mice develop severe, eventually fatal anemia after engraftment	[18, 68, 69, 70]
	Innate immunity	inrease myeloid support	many functional mast cells
	Adaptive immunity	More rapid T cell development compared to NGS	Increased basal IgM and IgG; increased delayed hypersensitivity responses compared to NSG. T cells skewed towards CD4 lineage; Treg development
NOG-IL-15 Tg	Hematopoesis			[99, 100]
	Innate immunity
	Adaptive immunity	increase NK cells	increased maintenance and function of human NK cells
hIL-7xhIL-15 KI NSG	Hematopoesis			[101]
	Innate immunity
	Adaptive immunity	increase NK cells and T cells	multiple subsets of human T cells and NK cell development in multiple organs
SRG6	Hematopoesis			[73]
	Innate immunity
	Adaptive immunity	Improve B cell function	Immunoglobulin class switching after immunization with foreign antigen; enhanced thymopoiesis. Improved T cell development
SRG15	Hematopoesis			[46]
	Innate immunity
	Adaptive immunity	NK cell development	NK cell development and memory, CD8 memory formation, CD8 IEL development
MISTRG6	Hematopoesis			[72]
	Innate immunity
	Adaptive immunity	Growth of both malignant and non-malignant cells in the bone marrow (myeloma or MGUS)	First humanized mouse model that allowed growth of premalignant (MGUS) and malignant (myeloma) cells; Emergence of clones in the mouse xenograft that were below detection in the original patient sample
BRGST	Hematopoesis		larger thymus. Increased development	[74]
	Innate immunity
	Adaptive immunity	Secondary lymphoid tissue formation	Lymph node formation with compartmentalized B& T cell development. More mature B cells. Better antibody responses. Increased Tfh cell development. No Peyer's patches in the gastrointestinal tract
hBAFFKI	Hematopoesis			[105]
	Innate immunity
	Adaptive immunity	Improve B cell development and maturation	More immature human B cells than in mBAFF mice, decreased levels of IgG. Significantly reduced memory B cells, plasmablasts and plasma cells
